# Supplementary material for: Syntheses and structures of lanthanide borohydrides supported by a bridged bis(amidinate) ligand and their high activity for controlled polymerization of ε-caprolactone, l-lactide and rac-lactide
Source: Royal Society of Chemistry journal article supplement (doi:10.1039/c2dt30096f), 2012-01-01
Supplement: c2dt30096f.pdf [file c2dt30096f.pdf]

# Syntheses and Structures of Lanthanide Borohydrides Supported by a Bridged Bis(amidinate) Ligand and Their High Activity for the Controlled Polymerization of $\epsilon$ -Caprolactone, L-Lactide and *rac*-Lactide

Wenbo Li<sup>a</sup>, Mingqiang Xue<sup>a</sup>, Jing Tu<sup>a</sup>, Yong Zhang<sup>a</sup>, Qi Shen<sup>a, b\*</sup>

The end group analyses were conducted at the conditions as follow: the typical procedure,  $[M]_0/[I]_0 = 10$ , solvent = Tol,  $[M] = 0.20$  M, temperature = 20 °C, Time = 1h, and the polymerization solution was quenched by an addition of wet n-hexane and poured into n-hexane to precipitate the polymer. <sup>1</sup>H NMR spectra was recorded on a Unity Inova-400 spectroscopy instrument and processed using NUTS software in CDCl<sub>3</sub> at 20 °C.

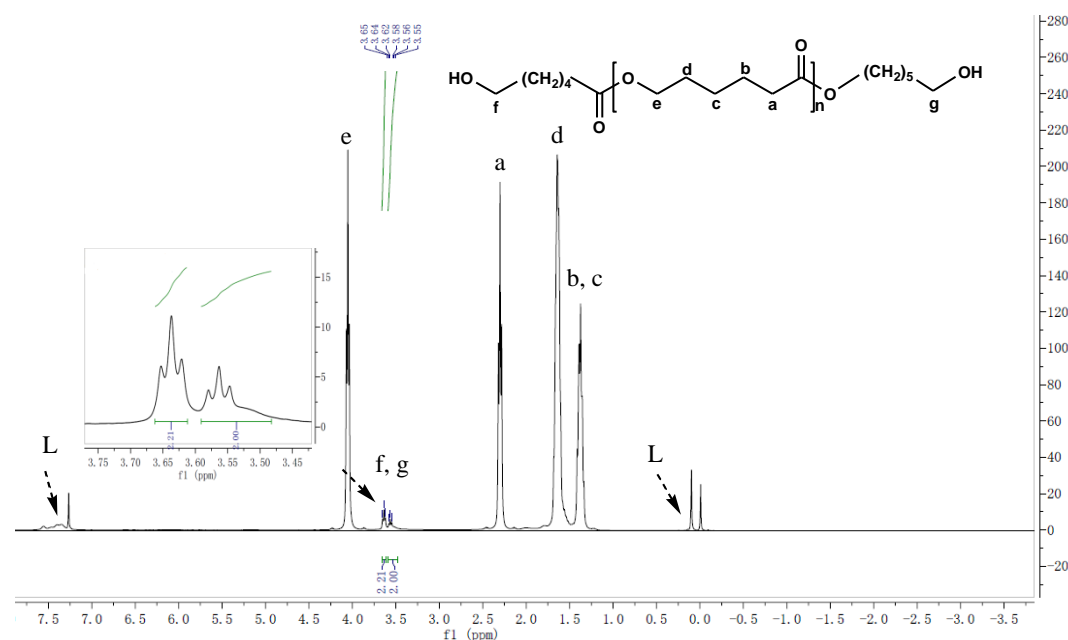

Figure 8. <sup>1</sup>H NMR spectrum of the product obtained by end group analysis of  $\epsilon$ -CL.

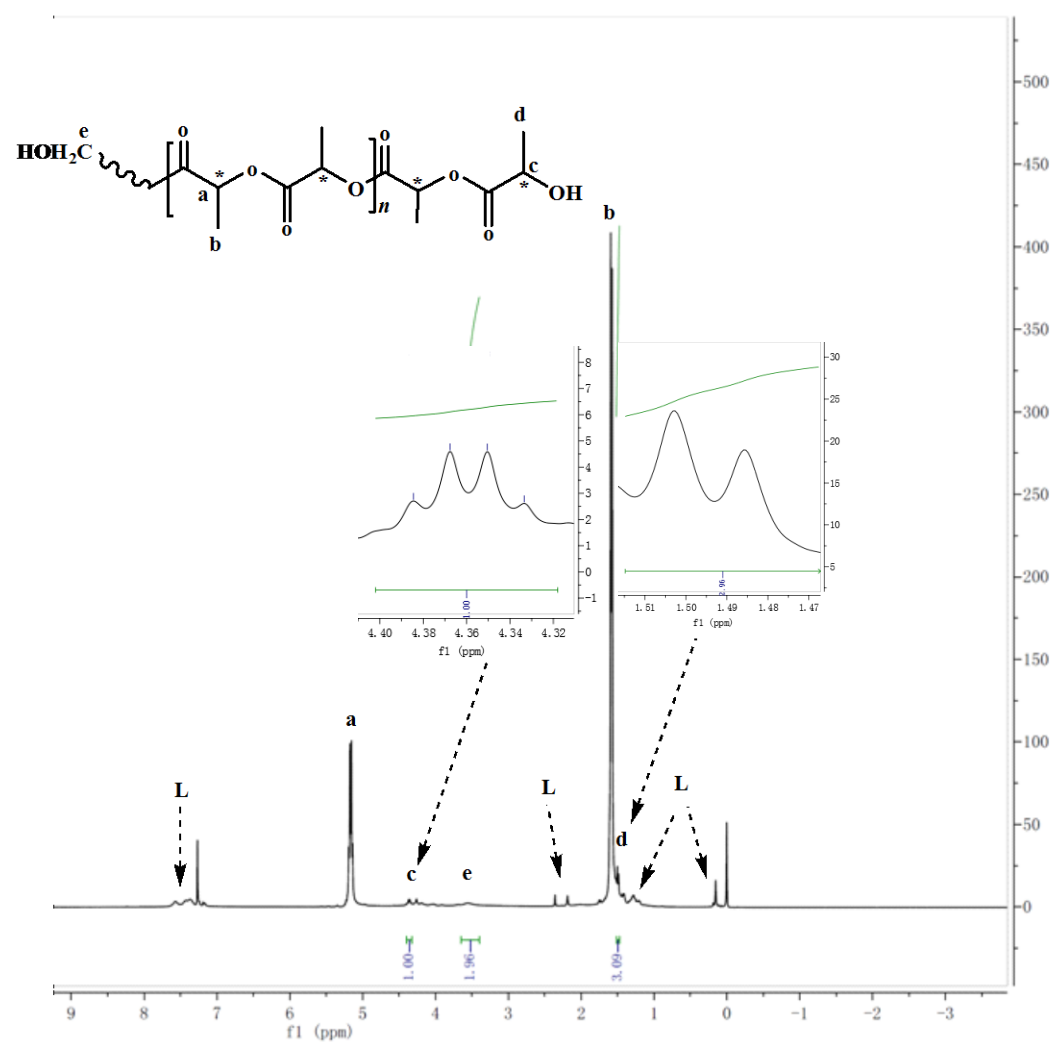

Figure 9.  $^1\text{H}$  NMR spectrum of the product obtained by end group analysis of L-LA.

c
